# Supplementary material
Source: PubMed Central journal article supplement (PMC4573845)
Supplement: NIHMS708332-supplement-Supplemental_Material.pdf [file NIHMS708332-supplement-Supplemental_Material.pdf]

**SUPPLEMENTAL MATERIAL**

**Preclinical Systolic and Diastolic Dysfunction in Metabolically Healthy  
and Unhealthy Obese Individuals**

**Supplemental Table 1.** Association of global longitudinal strain with obesity with or without metabolic syndrome compared with healthy controls after additional adjustment for metabolic factors

| <b>Model</b>                         | <b>OB/MS- vs controls</b>       |                 | <b>OB/MS+ vs controls</b>       |                 |
|--------------------------------------|---------------------------------|-----------------|---------------------------------|-----------------|
|                                      | <b><math>\beta</math> (s.e)</b> | <b><i>P</i></b> | <b><math>\beta</math> (s.e)</b> | <b><i>P</i></b> |
| Base model*                          | 2.5 (0.7)                       | 0.001           | 1.0 (0.3)                       | 0.001           |
| Base model + systolic blood pressure | 1.9 (0.8)                       | 0.015           | 0.7 (0.3)                       | 0.01            |
| Base model + waist circumference     | 2.0 (0.8)                       | 0.02            | 0.5 (0.4)                       | 0.16            |
| Base model + fasting glucose         | 2.3 (0.7)                       | 0.003           | 0.9 (0.3)                       | 0.002           |
| Base model + TG/HDL ratio            | 1.9 (0.7)                       | 0.02            | 1.1 (0.3)                       | 0.001           |

\*Adjusted for age, sex, race, heart rate

**Supplemental Table 2.** Sensitivity analysis excluding hypertensive individuals (n=96)

|                                          | <b>OB/MS- vs. controls</b>       |                 | <b>OB/MS+ vs. controls</b>       |                 | <b>OB/MS+ vs. OB/MS-</b>         |                 |
|------------------------------------------|----------------------------------|-----------------|----------------------------------|-----------------|----------------------------------|-----------------|
|                                          | <b><math>\beta</math> (s.e)*</b> | <b><i>P</i></b> | <b><math>\beta</math> (s.e)*</b> | <b><i>P</i></b> | <b><math>\beta</math> (s.e)*</b> | <b><i>P</i></b> |
| Left atrial diameter                     | 4.5 (1.3)                        | 0.001           | 2.6 (0.4)                        | <0.001          |                                  |                 |
| Left ventricular end-diastolic dimension |                                  |                 |                                  |                 | -3.3 (0.9)                       | 0.001           |
| Left ventricular end-systolic dimension  |                                  |                 |                                  |                 | -2.8 (1.0)                       | 0.004           |
| Relative wall thickness                  |                                  |                 | 0.02 (0.01)                      | 0.04            |                                  |                 |
| LV mass/height <sup>2.7</sup>            | 7.7 (2.4)                        | 0.002           | 4.3 (1.0)                        | <0.001          |                                  |                 |
| Mitral A-flow                            | 7.1 (3.2)                        | 0.03            | 5.3 (1.3)                        | <0.001          |                                  |                 |
| Mitral E/A ratio                         |                                  |                 | -0.11 (0.04)                     | 0.005           |                                  |                 |
| Isovolumic relaxation time               |                                  |                 | 5.5 (1.9)                        | 0.006           |                                  |                 |
| Mitral e' (cm/s)                         |                                  |                 |                                  |                 | -0.9 (0.4)                       | 0.03            |
| E/e' ratio                               |                                  |                 |                                  |                 |                                  |                 |
| Global longitudinal strain               | 2.0 (0.8)                        | 0.02            |                                  |                 |                                  |                 |
| Time-based dyssynchrony                  | 10.2 (3.9)                       | 0.01            | 5.8 (1.7)                        | 0.001           |                                  |                 |

\* $\beta$  estimate represents difference in echocardiographic characteristic between two groups after adjustment for age, sex, race, and heart rate. Regression models with  $P > 0.05$  for differences between groups are not displayed.

**Supplemental Table 3.** Sensitivity analysis excluding diabetic individuals (n=57)

|                                          | <b>OB/MS- vs. controls</b>       |                 | <b>OB/MS+ vs. controls</b>       |                 | <b>OB/MS+ vs. OB/MS-</b>         |                 |
|------------------------------------------|----------------------------------|-----------------|----------------------------------|-----------------|----------------------------------|-----------------|
|                                          | <b><math>\beta</math> (s.e)*</b> | <b><i>P</i></b> | <b><math>\beta</math> (s.e)*</b> | <b><i>P</i></b> | <b><math>\beta</math> (s.e)*</b> | <b><i>P</i></b> |
| Left atrial diameter                     | 5.7 (1.2)                        | <0.001          | 3.0 (0.4)                        | <0.001          |                                  |                 |
| Left ventricular end-diastolic dimension | 3.7 (1.1)                        | 0.002           |                                  |                 | -2.3 (0.9)                       | 0.007           |
| Left ventricular end-systolic dimension  | 2.8 (1.0)                        | 0.008           |                                  |                 | -2.5 (0.8)                       | 0.003           |
| Relative wall thickness                  |                                  |                 | 0.03 (0.01)                      | 0.003           |                                  |                 |
| LV mass/height <sup>2.7</sup>            | 11.2 (2.5)                       | <0.001          | 5.3 (1.0)                        | <0.001          |                                  |                 |
| Mitral A-flow                            | 8.1 (3.2)                        | 0.01            | 7.0 (1.2)                        | <0.001          |                                  |                 |
| Mitral E/A ratio                         |                                  |                 | -0.12 (0.03)                     | <0.001          |                                  |                 |
| Isovolumic relaxation time               |                                  |                 | 5.7 (1.8)                        | 0.002           |                                  |                 |
| Mitral e' (cm/s)                         |                                  |                 | -0.8 (0.2)                       | 0.001           | -1.1 (0.4)                       | 0.01            |
| E/e' ratio                               | 1.0 (0.5)                        | 0.04            | 0.9 (0.3)                        | 0.001           | 1.1 (0.5)                        | 0.01            |
| Global longitudinal strain               | 2.5 (0.7)                        | 0.001           | 0.8 (0.3)                        | 0.01            |                                  |                 |
| Time-based dyssynchrony                  | 10.8 (3.3)                       | 0.002           | 7.3 (1.4)                        | <0.001          |                                  |                 |

\* $\beta$  estimate represents difference in echocardiographic characteristic between two groups after adjustment for age, sex, race, heart rate. Regression models with  $P > 0.05$  for differences between groups are not displayed.
